# Supplementary material for: Tempo and Mode in Evolution of Transcriptional Regulation
Source: PLOS journal article supplement (doi:10.1371/journal.pgen.1002432), 2012-01-19
Supplement: S1 (10.1371/journal.pgen.1002432.s001) [file journal.pgen.1002432.s001]

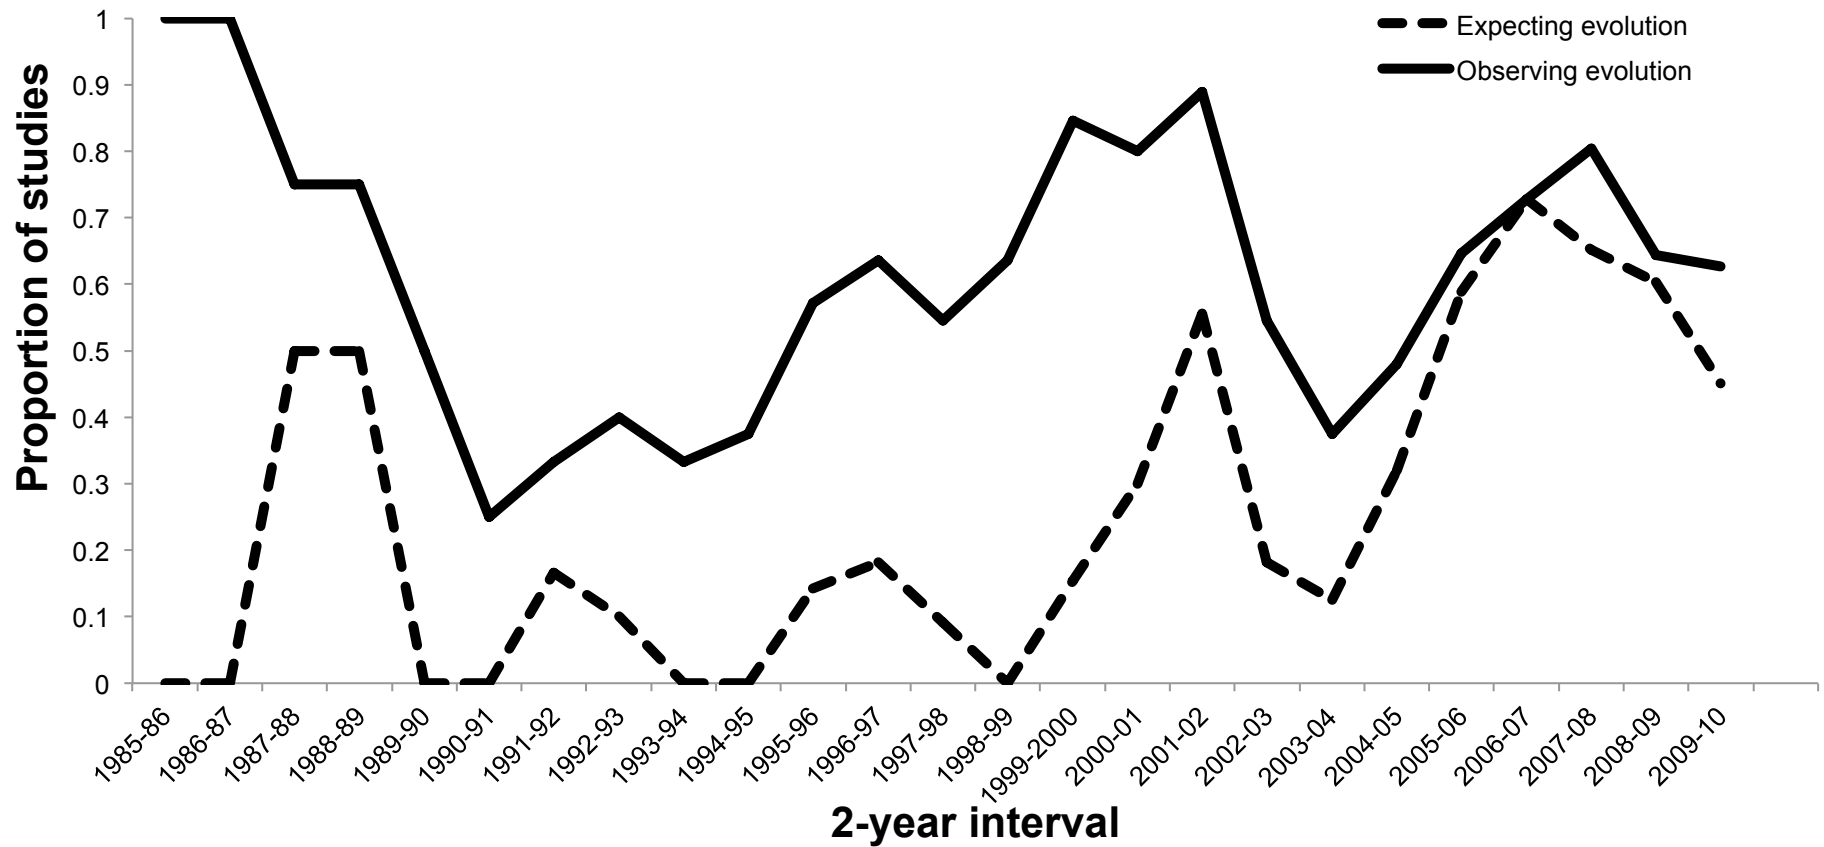

**Figure S1. Changes in expectations and observations of evolution in published literature over time.** Publications were sorted by year and coded for their expectations (dashed line) of evolution and observations (solid line) of evolution, as defined in Figure 1A, Categories 2-5 or Figure 1B, Category II. Proportions were calculated over sliding two-year intervals.
